# Supplementary material for: The Phylogenetic Relationship of Lamiinae (Coleoptera: Cerambycidae) Using Mitochondrial Genomes
Source: MDPI journal article supplement (doi:10.3390/genes15010013), 2023-12-20
Supplement: s1 [file s1]

**Table S6:** Comparative start and stop codons of newly sequenced genes. *Acalolepta permutans* (*A. permutans*), *Batocera* sp. (*B. sp.*), *Eutetrappa metallescens* (*E. metallescens*), *Glenea pulchra* (*G. pulchra*), *Lamiomimus gottschei* (*L. gottschei*), *Macrochenus isabellinus* (*Ma. isabellinus*), *Mesosa myops* (*Me. myops*), *Oberea vittata* (*O. vittata*), *Pharsalia subgemmata* (*P. subgemmata*), *Rondibilis* sp (*R. sp.*), *Saperda subobliterata* (*S. subobliterata*).

|                         | <i>atp6</i> | <i>atp8</i> | <i>cox1</i> | <i>cox2</i> | <i>cox3</i> | <i>cytb</i> | <i>nad1</i> | <i>nad2</i> | <i>nad3</i> | <i>nad4</i> | <i>nad4l</i> | <i>nad5</i> | <i>nad6</i> |
|-------------------------|-------------|-------------|-------------|-------------|-------------|-------------|-------------|-------------|-------------|-------------|--------------|-------------|-------------|
| <i>A. permutans</i>     | ATG/<br>TAA | ATT/<br>TAA | AAC/<br>T   | ATT/<br>T   | ATG/<br>TAA | ATG/<br>TAG | TTG/<br>TAG | ATT/<br>TAA | ATA/<br>TAG | ATG/<br>TA  | ATG/<br>TAA  | ATT/<br>TA  | ATT/<br>TAA |
| <i>B. sp.</i>           | ATG/<br>TAA | ATT/<br>TAA | AAA/<br>T   | ATC/<br>T   | ATG/<br>TA  | ATG/<br>TAG | TTG/<br>TAG | ATT/<br>TAA | ATC/<br>TAG | ATG/<br>TA  | ATG/<br>TAA  | ATT/<br>TA  | ATT/<br>TAA |
| <i>E. metallescens</i>  | ATG/<br>TAA | ATT/<br>TAA | AAC/<br>T   | ATT/<br>T   | ATG/<br>TAA | ATG/<br>TAG | TTG/<br>TAG | ATC/<br>TAA | ATT/<br>TAG | ATG/<br>TA  | ATG/<br>TAA  | ATA/<br>TA  | ATT/<br>TAA |
| <i>G. pulchra</i>       | ATG/<br>TAA | ATT/<br>TAA | AAC/<br>T   | ATT/<br>T   | ATG/<br>TAA | ATG/<br>TAG | TTG/<br>TAG | ATT/<br>TAA | ATT/<br>TAG | ATG/<br>TA  | ATG/<br>TAA  | ATG/<br>T   | ATT/<br>TAA |
| <i>L. gottschei</i>     | ATG/<br>TAA | ATT/<br>TAA | AAC/<br>TAA | ATT/<br>T   | ATG/<br>TAA | ATG/<br>TAG | TTG/<br>TAG | ATC/<br>TAA | ATT/<br>TAG | ATG/<br>TA  | ATG/<br>TAA  | ATT/<br>TAA | ATT/<br>TAA |
| <i>Ma. isabellinus</i>  | ATG/<br>TAA | ATT/<br>TAG | AAC/<br>T   | ATC/<br>T   | ATG/<br>TAA | ATG/<br>TAA | TTG/<br>TAG | ATT/<br>TAA | ATT/<br>TAG | ATG/<br>TA  | ATG/<br>TAA  | ATT/<br>TA  | ATT/<br>TAA |
| <i>Me. myops</i>        | ATG/<br>TAA | ATT/<br>TAA | ATT/<br>T   | ATT/<br>T   | ATG/<br>TAA | ATG/<br>TAG | TTG/<br>TAG | ATC/<br>TAA | ATT/<br>TAG | ATG/<br>TAA | ATG/<br>TAA  | ATT/<br>TA  | ATT/<br>TAA |
| <i>O. vittata</i>       | ATG/<br>TAA | ATT/<br>TAA | AAC/<br>T   | ATT/<br>T   | ATG/<br>TAA | ATG/<br>TAG | TTG/<br>TAG | ATT/<br>TAA | ATT/<br>TAG | ATG/<br>TA  | ATG/<br>TAA  | ATT/<br>TA  | ATA/<br>TAA |
| <i>P. subgemmata</i>    | ATG/<br>TAA | ATT/<br>TAG | AAC/<br>T   | ATT/<br>T   | ATG/<br>TA  | ATG/<br>TAG | TTG/<br>TAG | ATT/<br>TAA | ATA/<br>TAG | ATG/<br>TA  | ATG/<br>TAA  | ATT/<br>TA  | ATT/<br>TAA |
| <i>R. sp.</i>           | ATG/<br>TAA | ATC/<br>TAA | AAC/<br>T   | ATT/<br>T   | ATG/<br>TAG | ATG/<br>TAG | TTG/<br>TAG | ATT/<br>TAA | ATT/<br>TAG | ATG/<br>TAA | ATG/<br>TAA  | ATT/<br>TA  | ATT/<br>TAA |
| <i>S. subobliterata</i> | ATG/<br>TAA | ATT/<br>TAA | AAC/<br>TAA | ATT/<br>T   | ATG/<br>TAA | ATG/<br>TAG | TTG/<br>TAG | ATC/<br>TAA | ATC/<br>TAG | ATG/<br>TA  | ATG/<br>TAA  | ATT/<br>TA  | ATC/<br>TAA |
