# Supplementary material for: The Phylogenetic Relationship of Lamiinae (Coleoptera: Cerambycidae) Using Mitochondrial Genomes
Source: MDPI journal article supplement (doi:10.3390/genes15010013), 2023-12-20
Supplement: s1 [file s1]

Table S14: Repeats of A+T-rich region in *Mesosa myops*.

| Indices          | Period<br>Size | Copy<br>Number | Consensus<br>Size | Percent<br>Matches |
|------------------|----------------|----------------|-------------------|--------------------|
| <u>242-275</u>   | 15             | 2.2            | 16                | 89                 |
| <u>637-670</u>   | 15             | 2.2            | 16                | 89                 |
| <u>1-2768</u>    | 395            | 7.0            | 395               | 100                |
| <u>1032-1065</u> | 15             | 2.2            | 16                | 89                 |
| <u>1427-1460</u> | 15             | 2.2            | 16                | 89                 |
| <u>1822-1855</u> | 15             | 2.2            | 16                | 89                 |
| <u>2217-2250</u> | 15             | 2.2            | 16                | 89                 |
| <u>2612-2645</u> | 15             | 2.2            | 16                | 89                 |
| <u>2985-3023</u> | 18             | 2.1            | 19                | 86                 |
| <u>3409-3464</u> | 10             | 5.6            | 10                | 97                 |
| <u>3451-3499</u> | 21             | 2.3            | 21                | 100                |
| <u>3449-3489</u> | 12             | 3.7            | 12                | 75                 |
