# Supplementary material for: The Phylogenetic Relationship of Lamiinae (Coleoptera: Cerambycidae) Using Mitochondrial Genomes
Source: MDPI journal article supplement (doi:10.3390/genes15010013), 2023-12-20
Supplement: s1 [file s1]

Table S15: Repeats of A+T-rich region in *Oberea vittata*.

| Indices | Period<br>Size | Copy<br>Number | Consensus<br>Size | Percent<br>Matches |
|---------|----------------|----------------|-------------------|--------------------|
| 276-384 | 43             | 2.6            | 41                | 83                 |
| 295-483 | 15             | 13.1           | 14                | 66                 |
| 394-459 | 23             | 2.8            | 23                | 84                 |
| 391-461 | 2              | 38.5           | 2                 | 70                 |
| 357-485 | 16             | 8.1            | 15                | 69                 |
| 605-643 | 19             | 2.1            | 19                | 85                 |
