# Supplementary material for: The Phylogenetic Relationship of Lamiinae (Coleoptera: Cerambycidae) Using Mitochondrial Genomes
Source: MDPI journal article supplement (doi:10.3390/genes15010013), 2023-12-20
Supplement: s1 [file s1]

Table S13: Repeats of A+T-rich region in *Macrochenus isabellinus*.

| Indices | Period<br>Size | Copy<br>Number | Consensus<br>Size | Percent<br>Matches |
|---------|----------------|----------------|-------------------|--------------------|
| 3-111   | 57             | 1.9            | 58                | 98                 |
| 536-620 | 27             | 3.1            | 29                | 74                 |
