# Supplementary material for: The Phylogenetic Relationship of Lamiinae (Coleoptera: Cerambycidae) Using Mitochondrial Genomes
Source: MDPI journal article supplement (doi:10.3390/genes15010013), 2023-12-20
Supplement: s1 [file s1]

Table S10: Repeats of A+T-rich region in *Eutetrapha metallescens*.

| Indices | Period<br>Size | Copy<br>Number | Consensus<br>Size | Percent<br>Matches |
|---------|----------------|----------------|-------------------|--------------------|
| 319-500 | 2              | 102.0          | 2                 | 65                 |
| 327-503 | 13             | 14.2           | 13                | 67                 |
| 344-503 | 17             | 9.1            | 17                | 64                 |
| 319-515 | 42             | 4.8            | 42                | 71                 |
| 321-533 | 46             | 4.5            | 46                | 71                 |
| 311-520 | 29             | 6.7            | 32                | 71                 |
