# Supplementary material for: The Phylogenetic Relationship of Lamiinae (Coleoptera: Cerambycidae) Using Mitochondrial Genomes
Source: MDPI journal article supplement (doi:10.3390/genes15010013), 2023-12-20
Supplement: s1 [file s1]

Table S16: Repeats of A+T-rich region in *Pharsalia subgemmata*.

| Indices   | Period<br>Size | Copy<br>Number | Consensus<br>Size | Percent<br>Matches |
|-----------|----------------|----------------|-------------------|--------------------|
| 460-1092  | 71             | 8.9            | 71                | 100                |
| 1375-1515 | 2              | 79.0           | 2                 | 66                 |
| 1372-1433 | 15             | 4.5            | 14                | 73                 |
| 1372-1509 | 26             | 5.5            | 24                | 83                 |
| 1396-1481 | 23             | 3.7            | 22                | 74                 |
| 1375-1510 | 25             | 5.3            | 26                | 83                 |
| 1372-1514 | 48             | 3.0            | 47                | 79                 |
| 1419-1524 | 44             | 2.4            | 44                | 79                 |
| 1576-1619 | 19             | 2.2            | 20                | 84                 |
