# Supplementary material for: The Phylogenetic Relationship of Lamiinae (Coleoptera: Cerambycidae) Using Mitochondrial Genomes
Source: MDPI journal article supplement (doi:10.3390/genes15010013), 2023-12-20
Supplement: s1 [file s1]

Table S8: Repeats of A+T-rich region in *Acalolepta permutans*.

| Indices | Period<br>Size | Copy<br>Number | Consensus<br>Size | Percent<br>Matches |
|---------|----------------|----------------|-------------------|--------------------|
| 101-141 | 19             | 2.2            | 19                | 90                 |
| 318-408 | 44             | 2.0            | 44                | 81                 |
| 444-533 | 2              | 48.0           | 2                 | 67                 |
| 482-538 | 23             | 2.6            | 21                | 76                 |
| 788-820 | 1              | 33.0           | 1                 | 100                |
