# Supplementary material for: The Phylogenetic Relationship of Lamiinae (Coleoptera: Cerambycidae) Using Mitochondrial Genomes
Source: MDPI journal article supplement (doi:10.3390/genes15010013), 2023-12-20
Supplement: s1 [file s1]

Table S2: Best partitioning scheme and best-fitting models selected of mitochondrial 13 PCGs

| Nucleotide Aequence Alignments |            |                                                            |
|--------------------------------|------------|------------------------------------------------------------|
| Subset                         | Best Model | Partition names                                            |
| 1                              | GTR+I+G    | <i>cytb_codon1, atp6_codon1</i>                            |
| 2                              | TVM+I+G    | <i>cytb_codon2, atp6_codon2, nad3_codon2</i>               |
| 3                              | TVM+G      | <i>cox2_codon3, atp6_codon3</i>                            |
| 4                              | GTR+I+G    | <i>atp8_codon2, nad3_codon1, atp8_codon1, nad6_codon1</i>  |
| 5                              | GTR+G      | <i>atp8_codon3, nad6_codon3</i>                            |
| 6                              | GTR+I+G    | <i>cox1_codon1, cox3_codon1</i>                            |
| 7                              | TVM+I+G    | <i>cox2_codon2, cox3_codon2, cox1_codon2</i>               |
| 8                              | GTR+I+G    | <i>nad3_codon3, cox1_codon3</i>                            |
| 9                              | GTR+I+G    | <i>cox2_codon1</i>                                         |
| 10                             | GTR+I+G    | <i>cox3_codon3, cytb_codon3</i>                            |
| 11                             | GTR+I+G    | <i>nad4_codon1, nad5_codon1, nad4l_codon1, nad1_codon1</i> |
| 12                             | GTR+I+G    | <i>nad4l_codon2, nad1_codon2, nad4_codon2, nad5_codon2</i> |
| 13                             | TVM+I+G    | <i>nad4_codon3, nad1_codon3, nad4l_codon3</i>              |
| 14                             | GTR+I+G    | <i>nad2_codon1</i>                                         |
| 15                             | GTR+I+G    | <i>nad6_codon2, nad2_codon2</i>                            |
| 16                             | TRN+G      | <i>nad2_codon3</i>                                         |
| 17                             | TRN+I+G    | <i>nad5_codon3</i>                                         |
