# Supplementary material for: The Phylogenetic Relationship of Lamiinae (Coleoptera: Cerambycidae) Using Mitochondrial Genomes
Source: MDPI journal article supplement (doi:10.3390/genes15010013), 2023-12-20
Supplement: s1 [file s1]

**Table S21:** Specific primers used to verify the long IGSs of *Batocera* sp. and *Mesosa myops*.

| Name          | Sequence             |
|---------------|----------------------|
| YNWS-8-J-1252 | GTAAACTATCAACCTTCAAA |
| YNWS-8-N-3425 | CCTGCTAAAACCTGGTAATG |
| YNWS-8-J-1091 | TCTACGAATCACCTTTACAG |
| YNWS-8-N-2814 | GCCGAGTTTAAGCAGTAA   |
| JLWJD9-J-NAD  | ATTCTACACCAATCACAAA  |
| JLWJD9-N-NAD  | AAGCACCAAATAAGAAGT   |
