# Supplementary material for: The Phylogenetic Relationship of Lamiinae (Coleoptera: Cerambycidae) Using Mitochondrial Genomes
Source: MDPI journal article supplement (doi:10.3390/genes15010013), 2023-12-20
Supplement: s1 [file s1]

Table S12: Repeats of A+T-rich region in *Lamiomimus gottschei*.

| Indices    | Period<br>Size | Copy<br>Number | Consensus<br>Size | Percent<br>Matches |
|------------|----------------|----------------|-------------------|--------------------|
| 164--300   | 41             | 3.1            | 46                | 61                 |
| 118--1052  | 86             | 10.9           | 86                | 96                 |
| 336--558   | 41             | 5.1            | 46                | 60                 |
| 594--730   | 41             | 3.1            | 46                | 61                 |
| 766--988   | 41             | 5.1            | 46                | 61                 |
| 812--1028  | 41             | 5.1            | 40                | 61                 |
| 1272--1319 | 19             | 2.6            | 18                | 83                 |
| 1287--1359 | 11             | 7.4            | 10                | 69                 |
| 1295--1391 | 17             | 5.7            | 17                | 70                 |
| 1279--1385 | 47             | 2.3            | 47                | 79                 |
