# Supplementary material for: The Phylogenetic Relationship of Lamiinae (Coleoptera: Cerambycidae) Using Mitochondrial Genomes
Source: MDPI journal article supplement (doi:10.3390/genes15010013), 2023-12-20
Supplement: s1 [file s1]

Table S18: Repeats of A+T-rich region in *Saperda subobliterata*.

| Indices | Period<br>Size | Copy<br>Number | Consensus<br>Size | Percent<br>Matches |
|---------|----------------|----------------|-------------------|--------------------|
| 317-498 | 2              | 99.0           | 2                 | 66                 |
| 309-465 | 23             | 7.2            | 23                | 66                 |
| 315-515 | 25             | 7.8            | 25                | 68                 |
| 338-515 | 15             | 11.5           | 15                | 70                 |
| 342-501 | 17             | 9.1            | 17                | 69                 |
