# Supplementary material for: The Phylogenetic Relationship of Lamiinae (Coleoptera: Cerambycidae) Using Mitochondrial Genomes
Source: MDPI journal article supplement (doi:10.3390/genes15010013), 2023-12-20
Supplement: s1 [file s1]

**Table S1:** Information on the 158 species used for phylogenetic analysis.

| Accession No.       | Subfamily    | Spices                           | Length(bp) |
|---------------------|--------------|----------------------------------|------------|
| <b>Cerambycidae</b> |              |                                  |            |
| MN473105            | Aseminae     | <i>Arhopalus rusticus</i>        | 15,860     |
| MW067122            | Aseminae     | <i>Arhopalus unicolor</i>        | 15,760     |
| OM161964            | Aseminae     | <i>Cephalallus oberthueri</i>    | 15,763     |
| KC751569            | Cerambycinae | <i>Massicus raddei</i>           | 15,858     |
| KM112084            | Cerambycinae | <i>Xylotrechus grayii</i>        | 15,540     |
| KX087339            | Cerambycinae | <i>Pyrrhidium sanguineum</i>     | 16,203     |
| KY796055            | Cerambycinae | <i>Chlorophorus simillimus</i>   | 13,675     |
| MK570750            | Cerambycinae | <i>Xystrocera globosa</i>        | 15,707     |
| MK863508            | Cerambycinae | <i>Nortia carinicolis</i>        | 15,602     |
| MN442320            | Cerambycinae | <i>Pyrrhidium sanguineum</i>     | 15,748     |
| MN473096            | Cerambycinae | <i>Chlorophorus diadema</i>      | 15,398     |
| MN473097            | Cerambycinae | <i>Stenodryas</i> sp.            | 15,333     |
| MN473098            | Cerambycinae | <i>Trichoferus campestris</i>    | 15,737     |
| MN473101            | Cerambycinae | <i>Clytobius davidis</i>         | 15,571     |
| MN473112            | Cerambycinae | <i>Purpuricenus lituratus</i>    | 15,744     |
| MT371041            | Cerambycinae | <i>Aromia bungii</i>             | 15,760     |
| MT525962            | Cerambycinae | <i>Neoplocaederus obesus</i>     | 15,683     |
| MT740323            | Cerambycinae | <i>Epipedocera atra</i>          | 15,662     |
| MT809475            | Cerambycinae | <i>Anoplistes halodendri</i>     | 15,697     |
| MW617355            | Cerambycinae | <i>Aromia bungii</i>             | 15,652     |
| MW858149            | Cerambycinae | <i>Zoodes fulguratus</i>         | 15,885     |
| MZ054170            | Cerambycinae | <i>Jebusaea hammerschmidtii</i>  | 15,619     |
| MZ707509            | Cerambycinae | <i>Chlorophorus annularis</i>    | 15,487     |
| OK189517            | Cerambycinae | <i>Turanoclytus namaganensis</i> | 15,565     |
| OK393714            | Cerambycinae | <i>Aromia bungii</i>             | 15,759     |
| OL415177            | Cerambycinae | <i>Aromia bungii</i>             | 15,760     |
| OM069308            | Cerambycinae | <i>Nadezhdiella cantori</i>      | 16,049     |
| OM069309            | Cerambycinae | <i>Allotraeus orientalis</i>     | 15,966     |
| OM069310            | Cerambycinae | <i>Xoanodera maculata</i>        | 15,767     |
| OM645192            | Cerambycinae | <i>Trachylophus sinensis</i>     | 15,746     |
| OP096419            | Cerambycinae | <i>Demonax pseudonotabilis</i>   | 15,527     |
| KX035158            | Disteniinae  | <i>Disteniidae</i> sp.           | 15,598     |
| MN473106            | Disteniinae  | <i>Distenia gracilis</i>         | 15,704     |
| MN473107            | Disteniinae  | <i>Typodryas</i> sp.             | 15,647     |
| MN473109            | Disteniinae  | <i>Clytomelegena kabakovi</i>    | 15,816     |
| ON838309            | Disteniinae  | <i>Distenia punctulatoides</i>   | 15675      |
| MN420488            | Dorcasominae | <i>Tsivoka simplicicollis</i>    | 16,700     |
| MN447435            | Dorcasominae | <i>Dorcasomus pinheyi</i>        | 16,040     |

|           |          |                                    |        |
|-----------|----------|------------------------------------|--------|
| OR149089  | Lamiinae | <i>Acalolepta permutans</i>        | 15,500 |
| OR149086  | Lamiinae | <i>Batocera</i> sp.                | 16,843 |
| OR149087  | Lamiinae | <i>Eutetrappa metallescens</i>     | 15,505 |
| OR149088* | Lamiinae | <i>Glenea pulchra</i>              | 15,470 |
| OR149090  | Lamiinae | <i>Lamiomimus gottschei</i>        | 16,421 |
| OR149091  | Lamiinae | <i>Macrochenus isabellinus</i>     | 15,675 |
| OR149092  | Lamiinae | <i>Mesosa myops</i>                | 18,499 |
| OR149093  | Lamiinae | <i>Oberea vittata</i>              | 15,494 |
| OR149094  | Lamiinae | <i>Pharsalia subgemmata</i>        | 16,553 |
| OR149095  | Lamiinae | <i>Rondibilis</i> sp.              | 15,854 |
| OR149096  | Lamiinae | <i>Saperda subobliterata</i>       | 15,499 |
| FJ424074  | Lamiinae | <i>Psacothoea hilaris</i>          | 15,856 |
| JN986793  | Lamiinae | <i>Batocera lineolata</i>          | 15,418 |
| KJ809086  | Lamiinae | <i>Monochamus alternatus</i>       | 15,874 |
| KT726932  | Lamiinae | <i>Anoplophora chinensis</i>       | 15,805 |
| KX184801  | Lamiinae | <i>Apriona swainsoni</i>           | 15,412 |
| KY773692  | Lamiinae | <i>Agapanthia daurica</i>          | 14,282 |
| KY796054  | Lamiinae | <i>Olenecamptus subobliteratus</i> | 13,854 |
| MF521888  | Lamiinae | <i>Batocera lineolata</i>          | 15,420 |
| MK423971  | Lamiinae | <i>Aristobia reticulator</i>       | 15,838 |
| MK863507  | Lamiinae | <i>Blephephaeus succinator</i>     | 15,554 |
| MK863509  | Lamiinae | <i>Oberea yaoshana</i>             | 15,529 |
| MK863510  | Lamiinae | <i>Pterolophia</i> sp.             | 16,063 |
| MK863511  | Lamiinae | <i>Thermistis croceocincta</i>     | 15,503 |
| MN044086  | Lamiinae | <i>Glenea cantor</i>               | 15,514 |
| MN248534  | Lamiinae | <i>Anoplophora horsfieldi</i>      | 15,796 |
| MN356095  | Lamiinae | <i>Annamanum lunulatum</i>         | 15,610 |
| MN473099  | Lamiinae | <i>Acanthocinus griseus</i>        | 15,600 |
| MN473100  | Lamiinae | <i>Niphona lateraliplagiata</i>    | 15,902 |
| MN473114  | Lamiinae | <i>Agapanthia daurica</i>          | 17,153 |
| MN473116  | Lamiinae | <i>Epiglenea comes</i>             | 15,213 |
| MN473117  | Lamiinae | <i>Glenea licenti</i>              | 15,435 |
| MN473119  | Lamiinae | <i>Menesia sulphurata</i>          | 15,551 |
| MN610562  | Lamiinae | <i>Apomecyna saltator</i>          | 14,949 |
| MN709785  | Lamiinae | <i>Oberea diversipes</i>           | 15,499 |
| MN882586  | Lamiinae | <i>Anoplophora chinensis</i>       | 15,871 |
| MT547196  | Lamiinae | <i>Monochamus alternatus</i>       | 15,880 |
| MT740324  | Lamiinae | <i>Olenecamptus bilobus</i>        | 15,262 |
| MW067123  | Lamiinae | <i>Agelasta perplexa</i>           | 15,552 |
| MW067124  | Lamiinae | <i>Monochamus sparsutus</i>        | 16,029 |
| MW364565  | Lamiinae | <i>Anoplophora horsfieldi</i>      | 15,837 |

|          |             |                                         |        |
|----------|-------------|-----------------------------------------|--------|
| MW617354 | Lamiinae    | <i>Agapanthia amurensis</i>             | 15,512 |
| MW617356 | Lamiinae    | <i>Moechotypa diphysis</i>              | 15,493 |
| MW629558 | Lamiinae    | <i>Batocera lineolata</i>               | 16,158 |
| MW858148 | Lamiinae    | <i>Paraglenea fortunei</i>              | 15,496 |
| MW858150 | Lamiinae    | <i>Aulaconotus atronotatus</i>          | 14,491 |
| MW858151 | Lamiinae    | <i>Apriona germarii</i>                 | 14,858 |
| MW858152 | Lamiinae    | <i>Monochamus alternatus</i>            | 14,189 |
| MZ073344 | Lamiinae    | <i>Batocera lineolata</i>               | 15,420 |
| MZ955033 | Lamiinae    | <i>Saperda tetrastigma</i>              | 15,563 |
| NC013070 | Lamiinae    | <i>Psacotheta hilaris</i>               | 15,866 |
| OK030905 | Lamiinae    | <i>Morimospasma tuberculatum</i>        | 15,485 |
| OM161963 | Lamiinae    | <i>Batocera rubus</i>                   | 16,158 |
| ON641973 | Lamiinae    | <i>Pseudoechthistatus hei</i>           | 16,103 |
| OP006455 | Lamiinae    | <i>Pseudoechthistatus chiangshunani</i> | 16,419 |
| OP169419 | Lamiinae    | <i>Monochamus saltuarius</i>            | 15,896 |
| OP169420 | Lamiinae    | <i>Monochamus sartor urussovii</i>      | 15,912 |
| OP613265 | Lamiinae    | <i>Sthenias yunnanus</i>                | 15,633 |
| KX087246 | Lepturinae  | <i>Brachyta interrogationis</i>         | 18,165 |
| KX087264 | Lepturinae  | <i>Cortodera humeralis</i>              | 15,928 |
| KX087348 | Lepturinae  | <i>Stenurella nigra</i>                 | 16,504 |
| KY773687 | Lepturinae  | <i>Anastrangalia sequensi</i>           | 16,269 |
| MN420469 | Lepturinae  | <i>Leptura annularis</i>                | 16,530 |
| MN473080 | Lepturinae  | <i>Grammoptera ruficornis</i>           | 16,458 |
| MN473082 | Lepturinae  | <i>Stenocorus meridianus</i>            | 16,227 |
| MN473095 | Lepturinae  | <i>Peithona prionoides</i>              | 13,636 |
| MN473103 | Lepturinae  | <i>Rhagium forticostatum</i>            | 16,274 |
| MN473111 | Lepturinae  | <i>Teledapalpus zolotichini</i>         | 16,651 |
| MN473113 | Lepturinae  | <i>Sachalinobia koltzei</i>             | 15,809 |
| MN473110 | Necydalinae | <i>Ullochaetes vacca</i>                | 15,593 |
| MN420466 | Oxypeltinae | <i>Oxypeltus quadrispinosus</i>         | 17,001 |
| KY773686 | Prioninae   | <i>Aegosoma sinicum</i>                 | 15,658 |
| MF521835 | Prioninae   | <i>Callipogon relictus</i>              | 15,742 |
| MG460483 | Prioninae   | <i>Dorystenes paradoxus</i>             | 15,922 |
| MK614532 | Prioninae   | <i>Howea angulata</i>                   | 15,626 |
| MK614533 | Prioninae   | <i>Olethrius laevipennis</i>            | 15,690 |
| MK614534 | Prioninae   | <i>Ultra nitida</i>                     | 14,976 |
| MK614535 | Prioninae   | <i>Phaolus metallicus</i>               | 15,997 |
| MK614536 | Prioninae   | <i>Cnemoplites australis</i>            | 15,675 |
| MK614537 | Prioninae   | <i>Bifidoprionus rufus</i>              | 15,590 |
| MK614538 | Prioninae   | <i>Aesa media</i>                       | 15,714 |
| MK614540 | Prioninae   | <i>Rhipidocerus australasiae</i>        | 15,721 |

|                   |               |                                            |        |
|-------------------|---------------|--------------------------------------------|--------|
| MK614541          | Prioninae     | <i>Brephilydia jejuna</i>                  | 15,659 |
| MK614542          | Prioninae     | <i>Hermerius prionoides</i>                | 13,696 |
| MK614543          | Prioninae     | <i>Cacodacnus planicollis</i>              | 15,671 |
| MK614544          | Prioninae     | <i>Geoffmonteithia queenslanda</i>         | 15,628 |
| MK614545          | Prioninae     | <i>Enneaphyllus aeneipennis</i>            | 16,505 |
| MK614546          | Prioninae     | <i>Eboraphyllus middletoni</i>             | 15,776 |
| MK614547          | Prioninae     | <i>Eurynassa australis</i>                 | 15,612 |
| MK614548          | Prioninae     | <i>Toxeutes arcuatus</i>                   | 15,859 |
| MK614549          | Prioninae     | <i>Pseudoplites inexpectatus</i>           | 15,651 |
| MK614550          | Prioninae     | <i>Agrianome spinicollis</i>               | 15,633 |
| MK614551          | Prioninae     | <i>Analophus parallelus</i>                | 15,722 |
| MK614552          | Prioninae     | <i>Xixuthrus</i> sp.                       | 15,523 |
| MK614553          | Prioninae     | <i>Teispes insularis</i>                   | 15,632 |
| MK614554          | Prioninae     | <i>Archetypus frenchi</i>                  | 16,156 |
| MK614555          | Prioninae     | <i>Sceleocantha</i> sp.                    | 15,804 |
| MK614556          | Prioninae     | <i>Cnemoplites edulis</i>                  | 13,161 |
| MK614559          | Prioninae     | <i>Toxeutes macleayi</i>                   | 13,579 |
| MN420471          | Prioninae     | <i>Aegolipton marginale</i>                | 16,759 |
| MN420482          | Prioninae     | <i>Nepiodes costipennis multicarinatus</i> | 15,935 |
| MN473090          | Prioninae     | <i>Tragosoma depsarium</i>                 | 15,712 |
| MN473091          | Prioninae     | <i>Sarmyodus</i> sp.                       | 15,720 |
| MN473102          | Prioninae     | <i>Phlyctenosis</i> sp.                    | 15,000 |
| MN473115          | Prioninae     | <i>Aegosoma pallidum</i>                   | 15,668 |
| MN594765          | Prioninae     | <i>Megopis sinica</i>                      | 15,689 |
| MN607219          | Prioninae     | <i>Paulhutchinsonia pilosicollis</i>       | 15,846 |
| MN829437          | Prioninae     | <i>Dorystenes granulosus</i>               | 15,858 |
| OM161965          | Prioninae     | <i>Priotyrannus closteroides</i>           | 15,854 |
| MN473088          | Spondylidinae | <i>Saphanus piceus</i>                     | 15,832 |
| MN420476          | Spondylinae   | <i>Spondylis buprestoides</i>              | 16,070 |
| MN473093          | Vesperinae    | <i>Vesperus sanzi</i>                      | 16,125 |
| MT826860          | Spondylinae   | <i>Spondylis buprestoides</i>              | 15,837 |
| <b>Vesperidae</b> |               |                                            |        |
| KT781589          |               | <i>Spiniphilus spinicornis</i>             | 15,707 |
| MN473092          |               | <i>Mantitheus pekinensis</i>               | 15,656 |
| MN473120          |               | <i>Philus antennatus</i>                   | 15,833 |
| MZ747394          |               | <i>Philus pallescens</i>                   | 15,750 |
| <b>Cucujidae</b>  |               |                                            |        |
| MK614518          |               | <i>Platus angusticollis</i>                | 15,921 |
| MK614524          |               | <i>Palaestes abruptus</i>                  | 15,534 |
| NC051939          |               | <i>Cucujus kempii</i>                      | 15,492 |

---

Note: red text indicates the newly sequenced mitochondrial genomes in this study.
