# Supplementary material for: The Phylogenetic Relationship of Lamiinae (Coleoptera: Cerambycidae) Using Mitochondrial Genomes
Source: MDPI journal article supplement (doi:10.3390/genes15010013), 2023-12-20
Supplement: s1 [file s1]

Table S11: Repeats of A+T-rich region in *Glenea pulchra*.

| Indices | Period<br>Size | Copy<br>Number | Consensus<br>Size | Percent<br>Matches |
|---------|----------------|----------------|-------------------|--------------------|
| 274-456 | 8              | 21.7           | 9                 | 67                 |
| 371-456 | 2              | 46.0           | 2                 | 71                 |
| 274-456 | 17             | 10.4           | 19                | 67                 |
| 354-449 | 15             | 6.7            | 15                | 73                 |
| 373-473 | 30             | 3.3            | 32                | 77                 |
| 368-459 | 15             | 6.0            | 15                | 70                 |
| 416-512 | 40             | 2.3            | 42                | 81                 |
