# Supplementary material for: The Phylogenetic Relationship of Lamiinae (Coleoptera: Cerambycidae) Using Mitochondrial Genomes
Source: MDPI journal article supplement (doi:10.3390/genes15010013), 2023-12-20
Supplement: s1 [file s1]

**Table S20:** Structure of long IGS of *Batocera* sp. and comparison with similar sequence.

| Specie                         | Length  | A+T   | Position        | Structure                                                                                                                                 |
|--------------------------------|---------|-------|-----------------|-------------------------------------------------------------------------------------------------------------------------------------------|
| <i>Pyrocoelia rufa</i>         | 1,724bp | 69.5% | <i>nad2</i> , W | 12 tandem repeats, 1 repeat of the beginning.                                                                                             |
| <i>Evania appendigaster</i>    | 534 bp  | 96.8% | K, D            | 3 types of tandem repeats (Each type has 7 copies, 12 copies, and 8 copies, respectively);<br>1 initial sequence;<br>1 terminal sequence. |
| <i>Metopodontus blanchardi</i> | 4,051bp | 65.4% | I , Q           | 17 tandem repeat sequences (15 copies are complete, 2 units are incomplete).                                                              |
| <i>Batocera</i> sp.            | 1,428bp | 72%   | W, C            | 18 tandem repeat sequences(17 copies are complete, 1 unit is incomplete).                                                                 |
