# Supplementary material for: The Phylogenetic Relationship of Lamiinae (Coleoptera: Cerambycidae) Using Mitochondrial Genomes
Source: MDPI journal article supplement (doi:10.3390/genes15010013), 2023-12-20
Supplement: s1 [file s1]

Table S9: Repeats of A+T-rich region in *Batocera* sp..

| Indices | Period<br>Size | Copy<br>Number | Consensus<br>Size | Percent<br>Matches |
|---------|----------------|----------------|-------------------|--------------------|
| 205-249 | 19             | 2.4            | 19                | 92                 |
| 326-396 | 25             | 2.8            | 26                | 81                 |
| 323-398 | 27             | 2.9            | 27                | 79                 |
