# Supplementary material for: The Phylogenetic Relationship of Lamiinae (Coleoptera: Cerambycidae) Using Mitochondrial Genomes
Source: MDPI journal article supplement (doi:10.3390/genes15010013), 2023-12-20
Supplement: s1 [file s1]

**Table S19:** Tandem repeats of long IGS of *Batocera* sp.

| Indices  | Period<br>Size | Copy<br>Number | Consensus<br>Size | Percent<br>Matches |
|----------|----------------|----------------|-------------------|--------------------|
| 14--1428 | 80             | 17.7           | 80                | 97                 |
| 14--1428 | 319            | 4.4            | 319               | 97                 |
