# Supplementary material for: The Phylogenetic Relationship of Lamiinae (Coleoptera: Cerambycidae) Using Mitochondrial Genomes
Source: MDPI journal article supplement (doi:10.3390/genes15010013), 2023-12-20
Supplement: s1 [file s1]

**Table S7:** A+T content and length of the A+T-rich region of the 11 new sequences including the sites and length of poly-T and poly-A sequences in the A+T-rich region.

| Species                        | A+T content | Length | T-stretch sites          | T-stretch length(bp) |
|--------------------------------|-------------|--------|--------------------------|----------------------|
| <i>Acalolepta permutans</i>    | 87%         | 878    | 288-298                  | 11                   |
|                                |             |        | 788-820                  | 33                   |
| <i>Batocera</i> sp.            | 85%         | 736    | 153-166                  | 14                   |
| <i>Eutetrappa metallescens</i> | 86%         | 869    | 283-293                  | 11                   |
|                                |             |        | 722-733                  | 12                   |
| <i>Glenea pulchra</i>          | 87%         | 813    | 238-248                  | 11                   |
|                                |             |        | 678-686                  | 9                    |
| <i>Lamiomimus gottschei</i>    | 78%         | 1763   | 1,242-1,254              | 13                   |
|                                |             |        | 1,472-1480               | 9                    |
|                                |             |        | 1,693-1703               | 11                   |
| <i>Macrochenus isabellinus</i> | 82%         | 1011   | 431-444                  | 14                   |
|                                |             |        | <b>A-stretch</b> 931-946 | 16                   |
| <i>Mesosa myops</i>            | 80%         | 3,560  | 2,937-2,948              | 12                   |
|                                |             |        | 3,459-3,467              | 9                    |
|                                |             |        | 3,480-3,488              | 9                    |
|                                |             |        | 3,529-3,537              | 9                    |
| <i>Oberea vittata</i>          | 87%         | 829    | 248-259                  | 12                   |
| <i>Pharsalia subgemmata</i>    | 86%         | 1922   | 1,336-1,349,             | 14                   |
|                                |             |        | 1,630-1,638              | 9                    |
|                                |             |        | 1,855-1,864              | 10                   |
|                                |             |        | 1,878-1,887              | 10                   |
|                                |             |        | 1,899-1,907              | 9                    |
|                                |             |        | <b>A-stretch</b> 25-33   | 9                    |
| <i>Rondibilis</i> sp.          | 90%         | 1,236  | 1,780-1,788              | 9                    |
|                                |             |        | 374-388                  | 15                   |
| <i>Saperda subobliterata</i>   | 86%         | 866    | 1,116-1124               |                      |
|                                |             |        | 282-290                  | 9                    |
|                                |             |        | 720-729                  |                      |
