# Supplementary material for: The Phylogenetic Relationship of Lamiinae (Coleoptera: Cerambycidae) Using Mitochondrial Genomes
Source: MDPI journal article supplement (doi:10.3390/genes15010013), 2023-12-20
Supplement: s1 [file s1]

Table S17: Repeats of A+T-rich region in *Rondibilis* sp..

| Indices | Period<br>Size | Copy<br>Number | Consensus<br>Size | Percent<br>Matches |
|---------|----------------|----------------|-------------------|--------------------|
| 62-91   | 15             | 2.0            | 15                | 100                |
| 214-345 | 41             | 3.2            | 40                | 73                 |
| 192-357 | 82             | 2.0            | 82                | 98                 |
| 266-338 | 32             | 2.3            | 32                | 79                 |
| 455-532 | 32             | 2.5            | 31                | 81                 |
| 489-829 | 19             | 19.9           | 18                | 73                 |
| 508-831 | 44             | 7.3            | 44                | 91                 |
| 480-835 | 132            | 2.7            | 132               | 92                 |
| 681-838 | 21             | 7.4            | 21                | 71                 |
